# Supplementary material for: Sensitivity of tropical woodland savannas to El Niño droughts
Source: Copernicus journal article supplement (doi:10.5194/bg-22-3949-2025), 2025-08-14
Supplement: Supplementary file 1 [file bg-22-3949-2025-supplement.zip]

# Sensitivity of tropical woodland savannas to El Niño droughts

Simone Matias Reis<sup>1,2\*</sup>, Yadvinder Malhi<sup>3</sup>, Ben Hur Marimon Junior<sup>2</sup>, Beatriz Schwantes Marimon<sup>2</sup>, Huanyuan Zhang-Zheng<sup>3</sup>, Igor Araújo<sup>2</sup>, Renata Freitag<sup>2</sup>, Edmar Almeida de Oliveira<sup>2</sup>, Karine da Silva Peixoto<sup>2</sup>, Luciana Januário de Souza<sup>2</sup>, Ediméia Laura Souza da Silva<sup>2</sup>, Eduarda Bernardes Santos<sup>2</sup>, Kamila Parreira da Silva<sup>2</sup>, Maélly Dállet Alves Gonçalves<sup>2</sup>, Cécile Girardin<sup>3</sup>, Cecilia Dahlsjö<sup>3</sup>, Oliver Phillips<sup>4</sup>, Imma Oliveras Menor<sup>3,5</sup>

<sup>1</sup>Laboratório de Ecologia de Ecossistemas Florestais e Savânicos, Centro de Ciências Biológicas e da Natureza, Universidade Federal do Acre, Rio Branco, Brazil

<sup>2</sup>Laboratório de Ecologia Vegetal/Programa de Pós-graduação em Ecologia e Conservação, Universidade do Estado de Mato Grosso, Nova Xavantina, Brazil

<sup>3</sup>School of Geography and the Environment, Environmental Change Institute, University of Oxford, Oxford, United Kingdom

<sup>4</sup>School of Geography, University of Leeds, Leeds, United Kingdom

<sup>5</sup>AMAP (Botanique et Modélisation de l'Architecture des Plantes et des Végétations), Université de Montpellier, CIRAD, CNRS, INRAE, IRD, Montpellier, France

Correspondence to: Simone Matias Reis (simonematiasreis@gmail.com)

**Table S1.** Climatic data between 2000 and 2020 from *cerrado* and *cerradão*, with the 1st month of the dry season (May) representing the beginning of each year's climatic calendar.

| Years     | Months    | MCWD<br>(mm) | Precipitation<br>(mm) | Maximum<br>temperature (°C) | Mean temperature<br>(°C) |
|-----------|-----------|--------------|-----------------------|-----------------------------|--------------------------|
| 2000-2013 | May-April | -510.4       | 1461.5                | 33.6                        | 24.7                     |
| 2013-2014 | May-April | -526.3       | 1671.9                | 33.7                        | 25.0                     |
| 2014-2015 | May-April | -454.9       | 1417.1                | 34.3                        | 25.1                     |
| 2015-2016 | May-April | -464.4       | 790.2                 | 35.4                        | 25.8                     |
| 2016-2017 | May-April | -883.7       | 1580.2                | 35.1                        | 25.7                     |
| 2017-2018 | May-April | -584.7       | 1066.7                | 34.7                        | 25.2                     |
| 2018-2019 | May-April | -575.4       | 1468.1                | 34.3                        | 25.4                     |
| 2019-2020 | May-April | -483.6       | 1444.9                | 34.2                        | 23.9                     |

**Table S2.** Synthesis of **NPP** values ( $\pm$  S.E.) from *cerrado* and *cerradão* between 2014 and 2019.  $NPP_{AG}$ , aboveground NPP;  $NPP_{BG}$  belowground NPP. All units are Mg C ha<sup>-1</sup> yr<sup>-1</sup>.

|                               | 2014 | S.E. | 2015 | S.E. | 2016 | S.E. | 2017 | S.E. | 2018 | S.E. | 2019 | S.E. | Mean | Error |
|-------------------------------|------|------|------|------|------|------|------|------|------|------|------|------|------|-------|
| <b><i>Cerrado</i></b>         |      |      |      |      |      |      |      |      |      |      |      |      |      |       |
| NPPlitterfall                 | 2.20 | 0.15 | 2.31 | 0.16 | 1.93 | 0.11 | 1.92 | 0.15 | 2.36 | 0.17 | 2.48 | 0.18 | 2.20 | 0.44  |
| NPPleaf                       | 1.94 | 0.16 | 1.95 | 0.16 | 1.67 | 0.11 | 1.66 | 0.15 | 1.99 | 0.16 | -    | -    | 1.84 | 0.37  |
| NPPtwigs                      | 0.12 | 0.01 | 0.13 | 0.01 | 0.11 | 0.01 | 0.14 | 0.01 | 0.16 | 0.02 | -    | -    | 0.13 | 0.03  |
| NPPprep(flower, fruit, seeds) | 0.11 | 0.01 | 0.17 | 0.01 | 0.10 | 0.00 | 0.12 | 0.01 | 0.17 | 0.01 | -    | -    | 0.13 | 0.04  |
| NPPother                      | 0.03 | 0.00 | 0.06 | 0.00 | 0.06 | 0.00 | 0.04 | 0.00 | 0.04 | 0.00 | -    | -    | 0.05 | 0.01  |
| NPPherbivory                  | 0.06 | 0.03 | 0.06 | 0.03 | 0.05 | 0.03 | 0.05 | 0.03 | 0.06 | 0.03 | -    | -    | 0.06 | 0.06  |
| NPPbranch turnover            | 0.14 | 0.05 | 0.14 | 0.05 | 0.23 | 0.07 | 0.23 | 0.07 | 0.23 | 0.11 | -    | -    | 0.19 | 0.17  |
| NPPacw $\geq$ 5cm dbh         | 1.16 | 0.12 | 1.31 | 0.13 | 1.31 | 0.13 | 1.31 | 0.13 | 1.29 | 0.13 | 1.29 | 0.13 | 1.28 | 0.29  |
| NPPcoarse root                | 1.59 | 1.09 | 1.79 | 1.23 | 1.79 | 1.23 | 1.79 | 1.23 | 1.77 | 1.21 | 1.77 | 1.21 | 1.75 | 3.22  |
| NPPfine root                  | 1.37 | 0.16 | 0.85 | 0.12 | 1.25 | 0.25 | 1.54 | 0.27 | 0.98 | 0.25 |      |      | 1.19 | 0.56  |
| NPP <sub>AG</sub>             | 3.56 | 0.20 | 3.82 | 0.21 | 3.52 | 0.18 | 3.51 | 0.21 | 3.94 | 0.24 |      |      | 3.67 | 0.51  |
| NPP <sub>BG</sub>             | 2.96 | 1.10 | 2.64 | 1.24 | 3.04 | 1.26 | 3.33 | 1.26 | 2.75 | 1.24 |      |      | 2.95 | 2.74  |
| NPP                           | 6.52 | 1.12 | 6.46 | 1.26 | 6.57 | 1.27 | 6.85 | 1.28 | 6.69 | 1.26 |      |      | 6.62 | 2.77  |
| <b><i>Cerradão</i></b>        |      |      |      |      |      |      |      |      |      |      |      |      |      |       |
| NPPlitterfall                 | 4.29 | 0.22 | 4.14 | 0.23 | 3.62 | 0.11 | 4.27 | 0.18 | 4.28 | 0.21 | 4.37 | 0.14 | 4.16 | 0.52  |
| NPPleaf                       | 3.04 | 0.18 | 3.38 | 0.22 | 2.50 | 0.09 | 3.47 | 0.18 | 2.96 | 0.19 | -    |      | 3.07 | 0.56  |
| NPPtwigs                      | 0.39 | 0.02 | 0.33 | 0.02 | 0.32 | 0.02 | 0.41 | 0.02 | 0.73 | 0.06 | -    |      | 0.44 | 0.18  |
| NPPprep(flower, fruit, seeds) | 0.76 | 0.07 | 0.32 | 0.02 | 0.68 | 0.05 | 0.39 | 0.03 | 0.46 | 0.04 | -    |      | 0.52 | 0.21  |
| NPPother                      | 0.10 | 0.01 | 0.11 | 0.00 | 0.13 | 0.01 | 0.11 | 0.01 | 0.17 | 0.01 | -    |      | 0.12 | 0.03  |
| NPPherbivory                  | 0.13 | 0.07 | 0.15 | 0.07 | 0.11 | 0.06 | 0.15 | 0.08 | 0.13 | 0.07 | 0.13 | 0.07 | 0.14 | 0.15  |
| NPPbranch turnover            | 0.49 | 0.41 | 0.49 | 0.41 | 0.49 | 0.41 | 0.49 | 0.41 | 0.49 | 0.41 | 0.49 | 0.41 | 0.49 | 0.92  |
| NPPacw $\geq$ 5cm dbh         | 2.78 | 0.28 | 1.16 | 0.12 | 1.16 | 0.12 | 2.21 | 0.22 | 2.21 | 0.22 | 2.21 | 0.22 | 1.96 | 0.85  |
| NPPcoarse root                | 0.61 | 0.10 | 0.26 | 0.04 | 0.26 | 0.04 | 0.49 | 0.08 | 0.49 | 0.08 | 0.49 | 0.08 | 0.43 | 0.23  |
| NPPfine root                  | 0.99 | 0.13 | 1.73 | 0.3  | 1.00 | 0.38 | 0.81 | 0.15 | 0.48 | 0.13 |      |      | 1.00 | 0.71  |
| NPP <sub>AG</sub>             | 7.69 | 0.55 | 5.94 | 0.49 | 5.38 | 0.44 | 7.12 | 0.50 | 7.11 | 0.52 | 7.20 | 0.49 | 6.74 | 1.47  |
| NPP <sub>BG</sub>             | 1.60 | 0.17 | 1.99 | 0.30 | 1.26 | 0.38 | 1.30 | 0.17 | 0.97 | 0.15 |      |      | 1.42 | 0.69  |
| NPP                           | 9.29 | 0.57 | 7.93 | 0.58 | 6.64 | 0.59 | 8.42 | 0.53 | 8.08 | 0.54 |      |      | 8.07 | 1.58  |
