# Supplementary material for: Sensitivity of tropical woodland savannas to El Niño droughts
Source: Copernicus journal article supplement (doi:10.5194/bg-22-3949-2025), 2025-08-14
Supplement: Supplementary file 1 [file bg-22-3949-2025-supplement.zip]

## Sheet: READ_ME
	This data package contains data from: Reis et al. (2025) "Sensitivity of tropical woodland savannas to El Niño droughts". Biogeosciences.
	Please, note the following:
	This dataset is licensed under an Attribution-NonCommercial-ShareAlike 4.0 International CC BY-NC-SA (https://creativecommons.org/licenses/by-nc-sa/4.0/)
	When using this data, please cite the original article:
	Reis et al (2025) Sensitivity of tropical woodland savannas to El Niño droughts. Biogeosciences DOI:
	Additionally, please cite the data package.
	Data from Reis et al (2025) Sensitivity of tropical woodland savannas to El Niño droughts. Biogeosciences. DOI:

## Sheet: Fig 1 - Climate
Year Interval	Months	Year	MCWD	Precipitation	Maximum_temperature
2000-2013	May-April	1	-518.73	1461.5	33.6
2013-2014	May-April	2	-526.3	1671.9	33.7
2014-2015	May-April	3	-454.9	1417.1	34.3
2015-2016	May-April	4	-464.4	790.2	35.4
2016-2017	May-April	5	-883.7	1580.2	35.1
2017-2018	May-April	6	-584.7	1066.7	34.7
2018-2019	May-April	7	-575.4	1468.1	34.3
2019-2020	May-April	8	-483.6	1444.9	NA

## Sheet: Fig. 2 productivity (NPP)
plot_code	year	component	MgC_ha_yr	se
Cerrado	2014	Herbivory	0.0601824	0.0300912
Cerrado	2014	Fine litter	2.2	0.15
Cerrado	2014	Branch	0.14	0.05
Cerrado	2014	Stem	1.16	0.12
Cerrado	2014	Fine root	1.37	0.16
Cerrado	2014	Coarse root	1.5892	1.09044
Cerrado	2015	Herbivory	0.0601824	0.0300912
Cerrado	2015	Fine litter	2.31	0.16
Cerrado	2015	Branch	0.14	0.05
Cerrado	2015	Stem	1.31	0.13
Cerrado	2015	Fine root	0.85	0.12
Cerrado	2015	Coarse root	1.7947	1.23145
Cerrado	2016	Herbivory	0.0518604	0.0259302
Cerrado	2016	Fine litter	1.93	0.11
Cerrado	2016	Branch	0.23	0.07
Cerrado	2016	Stem	1.31	0.13
Cerrado	2016	Fine root	1.25	0.25
Cerrado	2016	Coarse root	1.7947	1.23145
Cerrado	2017	Herbivory	0.0518604	0.0259302
Cerrado	2017	Fine litter	1.92	0.15
Cerrado	2017	Branch	0.23	0.07
Cerrado	2017	Stem	1.31	0.13
Cerrado	2017	Fine root	1.54	0.27
Cerrado	2017	Coarse root	0.5206	0.357214
Cerrado	2018	Herbivory	0.0620082	0.0310041
Cerrado	2018	Fine litter	2.36	0.17
Cerrado	2018	Branch	0.23	0.11
Cerrado	2018	Stem	1.29	0.13
Cerrado	2018	Fine root	0.98	0.25
Cerrado	2018	Coarse root	1.77	1.21
Cerradao	2014	Herbivory	0.13452	0.0672599
Cerradao	2014	Fine litter	4.29	0.22
Cerradao	2014	Branch	0.49	0.41
Cerradao	2014	Stem	2.78	0.28
Cerradao	2014	Fine root	0.99	0.13
Cerradao	2014	Coarse root	0.6116	0.101803
Cerradao	2015	Herbivory	0.149879	0.0749394
Cerradao	2015	Fine litter	4.14	0.23
Cerradao	2015	Branch	0.49	0.41
Cerradao	2015	Stem	1.16	0.12
Cerradao	2015	Fine root	1.73	0.3
Cerradao	2015	Coarse root	0.2552	0.0424788
Cerradao	2016	Herbivory	0.110567	0.0552833
Cerradao	2016	Fine litter	3.62	0.11
Cerradao	2016	Branch	0.49	0.41
Cerradao	2016	Stem	1.16	0.12
Cerradao	2016	Fine root	1	0.38
Cerradao	2016	Coarse root	0.2552	0.0424788
Cerradao	2017	Herbivory	0.153508	0.076754
Cerradao	2017	Fine litter	4.27	0.18
Cerradao	2017	Branch	0.49	0.41
Cerradao	2017	Stem	2.21	0.22
Cerradao	2017	Fine root	0.81	0.15
Cerradao	2017	Coarse root	0.4862	0.0809295
Cerradao	2018	Herbivory	0.13124	0.0656202
Cerradao	2018	Fine litter	4.28	0.21
Cerradao	2018	Branch	0.49	0.41
Cerradao	2018	Stem	2.21	0.22
Cerradao	2018	Fine root	0.48	0.13
Cerradao	2018	Coarse root	0.4862	0.0809295

## Sheet: Fig. 2 NPP C-W-R
plot_code	year	component	MgC_ha_yr	se	%	id
Cerrado	2014	Canopy	2.26	0.16	34.67	1
Cerrado	2014	Wood	2.89	0.98	44.32	2
Cerrado	2014	Root	1.37	0.16	21.01	3
Cerrado	2015	Canopy	2.37	0.16	36.66	1
Cerrado	2015	Wood	3.24	1.05	50.19	2
Cerrado	2015	Root	0.85	0.12	13.15	3
Cerrado	2016	Canopy	1.98	0.11	30.16	1
Cerrado	2016	Wood	3.33	1.04	50.8	2
Cerrado	2016	Root	1.25	0.25	19.04	3
Cerrado	2017	Canopy	1.97	0.15	28.78	1
Cerrado	2017	Wood	3.33	1.03	48.72	2
Cerrado	2017	Root	1.54	0.27	22.5	3
Cerrado	2018	Canopy	2.42	0.17	36.2	1
Cerrado	2018	Wood	3.29	1.22	49.2	2
Cerrado	2018	Root	0.98	0.25	14.6	3
Cerradao	2014	Canopy	4.42	0.23	47.57	1
Cerradao	2014	Wood	3.88	0.6	41.78	2
Cerradao	2014	Root	0.99	0.13	10.65	3
Cerradao	2015	Canopy	4.29	0.25	54.13	1
Cerradao	2015	Wood	1.91	0.5	24.04	2
Cerradao	2015	Root	1.73	0.3	21.83	3
Cerradao	2016	Canopy	3.73	0.12	56.22	1
Cerradao	2016	Wood	1.91	0.49	28.71	2
Cerradao	2016	Root	1	0.38	15.07	3
Cerradao	2017	Canopy	4.42	0.19	52.52	1
Cerradao	2017	Wood	3.19	0.56	37.86	2
Cerradao	2017	Root	0.81	0.15	9.62	3
Cerradao	2018	Canopy	4.41	0.22	54.6	1
Cerradao	2018	Wood	3.19	0.56	39.45	2
Cerradao	2018	Root	0.48	0.13	5.94	3

## Sheet: Fig. 3 Relative allocation
plot_code	year	Canopy	Fine root	Woody
Cerrado	2014	34.7	21.01	44.32
Cerrado	2015	36.7	13.15	50.19
Cerrado	2016	30.2	19.04	50.8
Cerrado	2017	28.8	22.5	48.72
Cerrado	2018	36.2	14.6	49.2
Cerradao	2014	47.57	10.65	41.78
Cerradao	2015	54.13	21.83	24.04
Cerradao	2016	56.22	15.07	28.71
Cerradao	2017	52.52	9.62	37.86
Cerradao	2018	54.6	5.94	39.45

## Sheet: Fig. 4 Canopy litterfall 
year	plot_code	Components	mean	se
2014	Cerrado	fruits	0.00918429	0.00121224
2014	Cerrado	leaves	0.16126	0.0110992
2014	Cerrado	other	0.00268763	0.000342667
2014	Cerrado	total	0.183326	0.0112751
2014	Cerrado	twigs	0.0101941	0.00123101
2014	Cerradao	fruits	0.0631095	0.00530519
2014	Cerradao	leaves	0.253047	0.0109897
2014	Cerradao	other	0.00871946	0.00219162
2014	Cerradao	total	0.357214	0.0143751
2014	Cerradao	twigs	0.0323383	0.00263175
2015	Cerrado	fruits	0.0140131	0.00173691
2015	Cerrado	leaves	0.162247	0.0103436
2015	Cerrado	other	0.00501719	0.000825204
2015	Cerrado	total	0.192086	0.0106929
2015	Cerrado	twigs	0.0109203	0.00157814
2015	Cerradao	fruits	0.0263638	0.00301687
2015	Cerradao	leaves	0.281939	0.0136353
2015	Cerradao	other	0.00932465	0.000833091
2015	Cerradao	total	0.345237	0.0146661
2015	Cerradao	twigs	0.0276099	0.00239585
2016	Cerrado	fruits	0.00826804	0.00109108
2016	Cerrado	leaves	0.138939	0.00732374
2016	Cerrado	other	0.00480797	0.000862505
2016	Cerrado	total	0.160998	0.00748838
2016	Cerrado	twigs	0.00900224	0.00121065
2016	Cerradao	fruits	0.0569255	0.00483558
2016	Cerradao	leaves	0.207988	0.00669995
2016	Cerradao	other	0.0104816	0.00117869
2016	Cerradao	total	0.301799	0.00884573
2016	Cerradao	twigs	0.0264031	0.00261422
2017	Cerrado	fruits	0.0110289	0.00169702
2017	Cerrado	leaves	0.150072	0.0108636
2017	Cerrado	other	0.00348743	0.000748958
2017	Cerrado	total	0.17456	0.0111995
2017	Cerrado	twigs	0.0128996	0.00278286
2017	Cerradao	fruits	0.0317672	0.00264449
2017	Cerradao	leaves	0.287759	0.0117883
2017	Cerradao	other	0.00890875	0.00143802
2017	Cerradao	total	0.355653	0.0129911
2017	Cerradao	twigs	0.0337856	0.0038891
2018	Cerrado	fruits	0.01427	0.00172199
2018	Cerrado	leaves	0.165834	0.010685
2018	Cerrado	other	0.00330406	0.000614891
2018	Cerrado	total	0.196606	0.0119859
2018	Cerrado	twigs	0.0134553	0.00348855
2018	Cerradao	fruits	0.0383606	0.00306885
2018	Cerradao	leaves	0.247571	0.011433
2018	Cerradao	other	0.0136779	0.00202878
2018	Cerradao	total	0.356784	0.015072
2018	Cerradao	twigs	0.0610374	0.0073836
2019	Cerrado	fruits	NA	NA
2019	Cerrado	leaves	NA	NA
2019	Cerrado	other	NA	NA
2019	Cerrado	total	0.206043	0.0117316
2019	Cerrado	twigs	NA	NA
2019	Cerradao	fruits	NA	NA
2019	Cerradao	leaves	NA	NA
2019	Cerradao	other	NA	NA
2019	Cerradao	total	0.364054	0.0161905
2019	Cerradao	twigs	NA	NA

## Sheet: Fig. 5 - Stem NPP
Plot	Year	StemNPP	se
Cerrado	2013-2015	1.16	0.12
Cerradao	2013-2015	2.78	0.28
Cerrado	2015-2017	1.31	0.13
Cerradao	2015-2017	1.16	0.12
Cerradao	2017-2020	2.21	0.22
Cerrado	2017-2020	1.29	0.13

## Sheet: Fig. 6 Fine root
interval	plot_code	mean_rootNPP	se_rootNPP
2014-2015	Cerrado	0.343028	0.110842
2014-2015	Cerradao	0.247208	0.0590404
2015-2016	Cerrado	0.212448	0.0181994
2015-2016	Cerradao	0.432324	0.1387
2017-2018	Cerrado	0.384867	0.119847
2017-2018	Cerradao	0.202968	0.066183
2018-2019	Cerrado	0.243836	0.0588861
2018-2019	Cerradao	0.120295	0.0261549

## Sheet: Metadata
Description
MCWD = maximum climatological water deﬁcit (mm in a rolling year)
Precipitation = total precipitation (mm/year)
Maximum_temperature = average maximum monthly temperatures
plot_code = plots names
% = Percentage allocated to one of the components
