# Supplementary material for: Sensitivity of tropical woodland savannas to El Niño droughts
Source: Copernicus journal article supplement (doi:10.5194/bg-22-3949-2025), 2025-08-14
Supplement: Supplementary file 2 [file bg-22-3949-2025-supplement.zip]

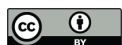

*Supplement of*

## **Sensitivity of tropical woodland savannas to El Niño droughts**

**Simone Matias Reis et al.**

*Correspondence to:* Imma Oliveras Menor ([imma@oxfordecosystems.co.uk](mailto:imma@oxfordecosystems.co.uk), [imma.oliverasmenor@ird.fr](mailto:imma.oliverasmenor@ird.fr))

- [bg-22-3949-2025-supplement-title-page.pdf](#)
- [Reiset al2025DataPackage.xlsx](#)
- [Supporting information.pdf](#)

The copyright of individual parts of the supplement might differ from the article licence.
